# Supplementary material for: The phenomenology of psilocybin’s experience mediates subsequent persistent psychological effects independently of sex, previous experience or setting
Source: bioRxiv or medRxiv preprint supplement (doi:10.1101/2024.08.26.24311611), 2024-08-26
Supplement: Supplementary file [file media-1.pdf]

## Online Supplement

### Inclusion Criteria

- a) Men and women ages 28 to 65
- b) Healthy volunteers with no psychiatric history (mental illnesses included in ICD 10 F0.X - F99.X)
- c) No family history of psychotic disorders up to second-degree relatives

### Exclusion Criteria:

- a) Pregnancy
- b) Intracranial hypertension, arterial hypertension or pulmonary hypertension
- c) Stroke
- d) Congestive heart failure
- e) Pacemaker
- f) Metal clamp in the head and/or face
- g) Celiac disease
- h) Left-handedness
- i) Usage of any medication on daily basis except for contraception
- j) Person in dependent position – students of medical faculties
- k) Person in dependent position – students of other faculties younger than 28

### Criteria for premature termination of participation in this study:

- a) Participant can cancel his participation anytime without giving any reason
- b) Changes in health state including use of pharmacological substances
- c) Changes in psychic state including traumatic events last 3 months (eg. death in family etc.)
- d) Pregnancy

e) Significant side effects that are related to assessments in this study

**Altered state of consciousness scale (ASCs)**

|      |            | DED         | OBN         | VRS         | G-ASC       |
|------|------------|-------------|-------------|-------------|-------------|
| EEG  | psilocybin | 28.7 (14.1) | 58.9 (23.8) | 60.1 (20.9) | 45,3 (19)   |
|      | placebo    | 2.89 (5.32) | 6.05 (11.6) | 3 (8.08)    | 3.95 (7.38) |
|      | F (1,37)   | 142.86      | 170.32      | 245.25      | 271.09      |
| fMRI | psilocybin | 29.1 (16.3) | 55.6 (27.5) | 60.9 (23.9) | 44.8 (17.5) |
|      | placebo    | 1.74 (3.27) | 2.49 (4.08) | 1.44 (2.78) | 1,89 (3)    |
|      | F (1,24)   | 59.81       | 88.76       | 185.36      | 132.01      |

**Table 2:** ANOVA showed a significant main effect of treatment for each subscale of ASCs (mean, SD, and F values above) in both study arms. There were no significant effects of between-subjects variables (sex, experience) or interactions.

## Persisting effects Questionnaire (PEQ)

|      |            | Attitudes about life | Attitudes about self | Mood changes | Behavior changes | Altruistic/positive social effects | Increased spirituality |
|------|------------|----------------------|----------------------|--------------|------------------|------------------------------------|------------------------|
| EEG  | psilocybin | 39.1 (22.2)          | 34.5 (21.9)          | 32.3 (23.6)  | 27.2 (21.2)      | 31.3 (25.5)                        | 28.2 (24.1)            |
|      | placebo    | 10.7 (14.9)          | 9.6 (15.9)           | 7.52 (11.9)  | 7.24 (13.3)      | 6.15 (17.3)                        | 8.79 (19)              |
|      | F (1,37)   | 55.31                | 46.62                | 41.78        | 24.91            | 39.30                              | 28.7                   |
| fMRI | psilocybin | 30.9 (24.4)          | 26.4 (22.8)          | 25.3 (24.3)  | 22.7 (21.6)      | 24.6 (26.1)                        | 24.8 (25)              |
|      | placebo    | 8.52 (19.1)          | 7.92 (16.8)          | 8.02 (18.6)  | 7.38 (16.3)      | 9.29 (22.1)                        | 8.25 (18.6)            |
|      | F (1,24)   | 16.04                | 12.97                | 10.71        | 8.94             | 13.05                              | 8.99                   |

**Table 3:** ANOVA showed a significant main effect of treatment for each positive subscale of PEQ (mean, SD, and F values above) in both study arms. There were no significant effects of between-subjects variables (sex, experience) or interactions. We did not observe any difference in negative subscales.

## Placebo responders and psilocybin non-responders, detailed characteristics of individuals

|                                    | Sex (M/F) | age range | weigh (kg) | dose (mg) | experienced (E) /naive (N) | mental healthcare professional (M) / other (O) | EEG/fMRI | session         | G-ASC | PEQ positive average | Psilocin plasma levels (ng/ml) |         |         |         |
|------------------------------------|-----------|-----------|------------|-----------|----------------------------|------------------------------------------------|----------|-----------------|-------|----------------------|--------------------------------|---------|---------|---------|
|                                    |           |           |            |           |                            |                                                |          |                 |       |                      | 60 min                         | 120 min | 240 min | 360 min |
| PLA responders                     | M         | 31-35     | 75         | 19        | E                          | O                                              | EEG      | 1 <sup>st</sup> | 33.38 | 25.82                | n.d.                           | n.d.    | n.d.    | n.d.    |
|                                    | F         | 36-40     | 56         | 16        | N                          | O                                              | EEG      | 1 <sup>st</sup> | 13.24 | 10.1                 | n.d.                           | n.d.    | n.d.    | n.d.    |
|                                    | F         | 26-30     | 67         | 18        | N                          | O                                              | EEG      | 2 <sup>nd</sup> | 32.04 | 38.99                | n.d.                           | n.d.    | n.d.    | n.d.    |
|                                    | F         | 26-30     | 65         | 17        | N                          | M                                              | EEG      | 2 <sup>nd</sup> | 7.89  | 16.65                | n.d.                           | n.d.    | n.d.    | n.d.    |
| PSI non-responder or low responder | F         | 46-50     | 67         | 17        | N                          | O                                              | EEG      | 1 <sup>st</sup> | 0     | 0.26                 | NA                             | 23      | 26      | 17      |
|                                    | F         | 26-30     | 60         | 16        | E                          | M                                              | EEG      | 1 <sup>st</sup> | 17.96 | 57.34                | 10                             | 12      | 10      | 6       |
|                                    | M         | 26-30     | 72         | 19        | E                          | O                                              | EEG      | 2 <sup>nd</sup> | 12.18 | 0                    | NA                             | NA      | NA      | NA      |
|                                    | M *       | 36-40     | 77         | 20        | E                          | M                                              | EEG      | 2 <sup>nd</sup> | 20.72 | 1.03                 | 24                             | 25      | 14      | 7       |
|                                    | M         | 31-35     | 56         | 16        | E                          | O                                              | fMRI     | 1 <sup>st</sup> | 19.15 | 21.18                | NA                             | NA      | NA      | NA      |
|                                    | M *       | 36-40     | 79         | 20        | E                          | M                                              | fMRI     | 1 <sup>st</sup> | 20.1  | 11.05                | 28                             | 12      | 5       | 3       |

\* identical subject

**Table 4.** Characteristics of placebo responders and psilocybin non-responders or mild responders based on ASCs. Placebo respondent's scores equal to the psilocybin group average and/or (scores above  $Q3 + 1.5 * IQR$ ) on all ASCs scales. Non-responders scores equal to placebo average and/or scores below  $Q1 - IQR$  on 3 out of 4 ASCs scales. PEQ positive average is an average of positive items on the PEQ scale. *n.d.* = *not detected*, *NA* = *not available*.

## Visualisation of VAS scale on emotional valence with psilocin levels and Peak + last point and correlations

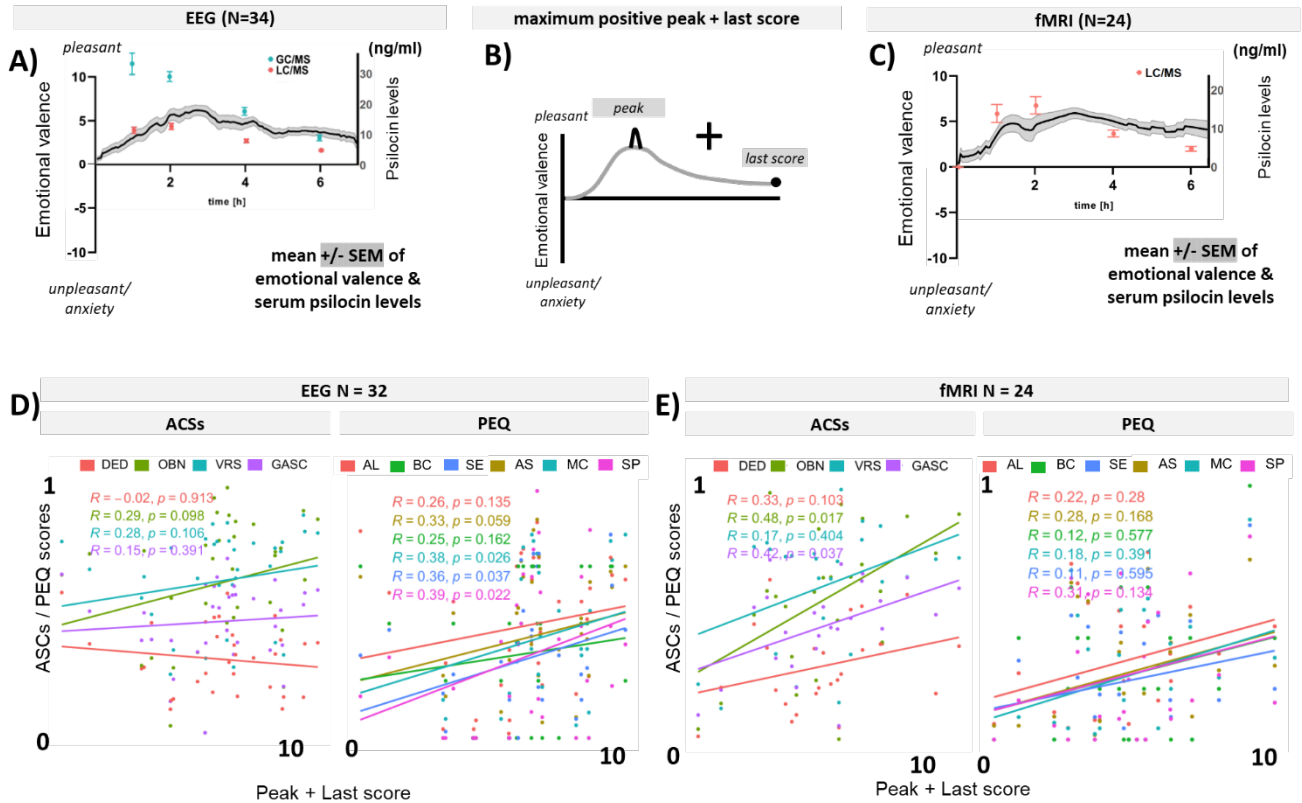

**Figure 5.** (A, C) visualisation of VAS scale on emotional valence with psilocin levels measured by (GC/MS and/or LC/MS) in EEG and fMRI arms. (B) schematic visualisation of peak + last point hypothesis. Below are correlations of ASCs and PEQ subscales with the „maximum positive peak + last score“ within EEG arm (D) and fMRI arm (E). *Shown P values are uncorrected*)
